# Supplementary material for: Iron-based nanoparticles embedded in a graphitic layer of carbon architectures as stable heterogeneous Friedel–Crafts acylation catalysts
Source: Royal Society of Chemistry journal article supplement (doi:10.1039/c9cy00598f), 2019-01-01
Supplement: c9cy00598f1.pdf [file c9cy00598f1.pdf]

**Electronic Supporting Information:**

**Iron-based nanoparticles embedded in graphitic layer of carbon architectures as stable heterogeneous Friedel-Crafts acylation catalysts**

Hao Zhang<sup>a</sup>, Xiaojing Song<sup>ab</sup>, Dianwen Hu<sup>a</sup>, Wenxiang Zhang<sup>a</sup>, and Mingjun Jia<sup>\*a</sup>

<sup>a</sup>Key Laboratory of Surface and Interface Chemistry of Jilin Province, College of Chemistry, Jilin University, Changchun, 130012, China

<sup>b</sup>State Key Laboratory of Inorganic Synthesis and Preparative Chemistry, College of Chemistry, Jilin University, Changchun, 130012, China

\* Corresponding author: Tel: (+86)431-85155390; Fax: (+86)431-85168420.

Email address: [jiamj@jlu.edu.cn](mailto:jiamj@jlu.edu.cn) (M. Jia)

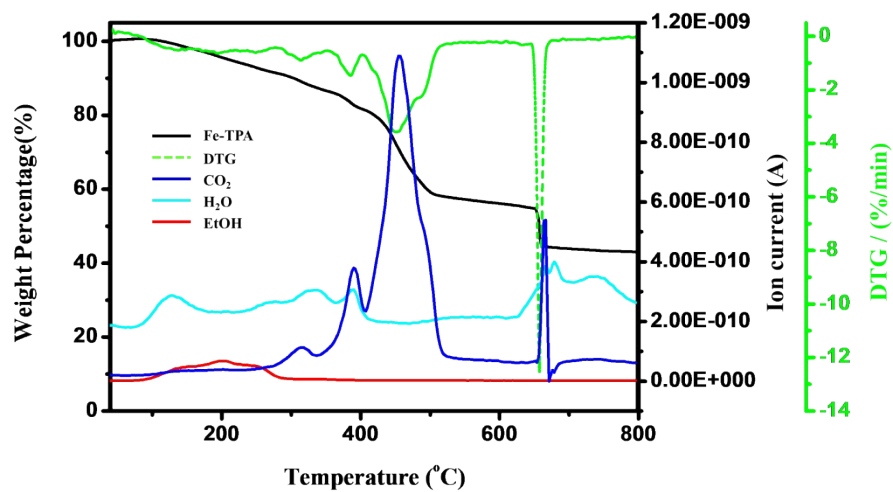

**Fig. S1** TG-MS profiles of the Fe-TPA under inert atmosphere.

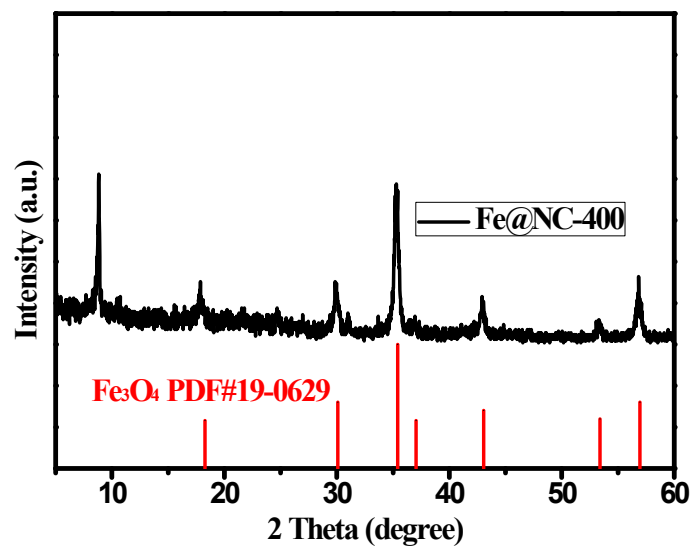

Fig. S2 XRD pattern of Fe@NC-400.

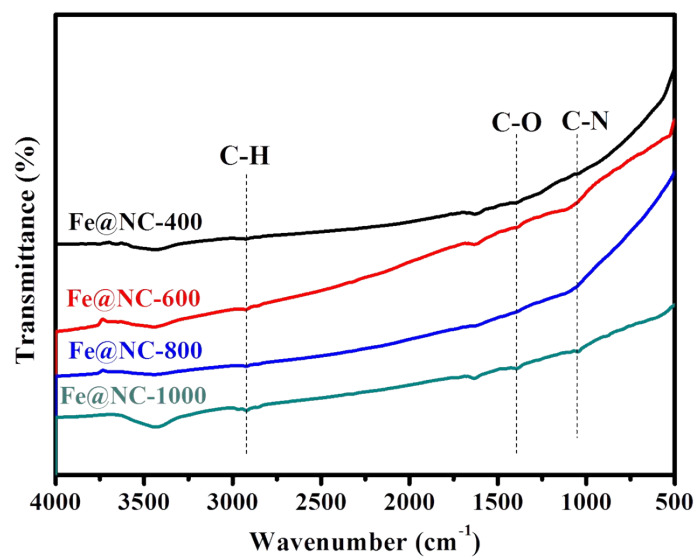

**Fig. S3** FT-IR spectra of the Fe@NC-*T* catalysts.

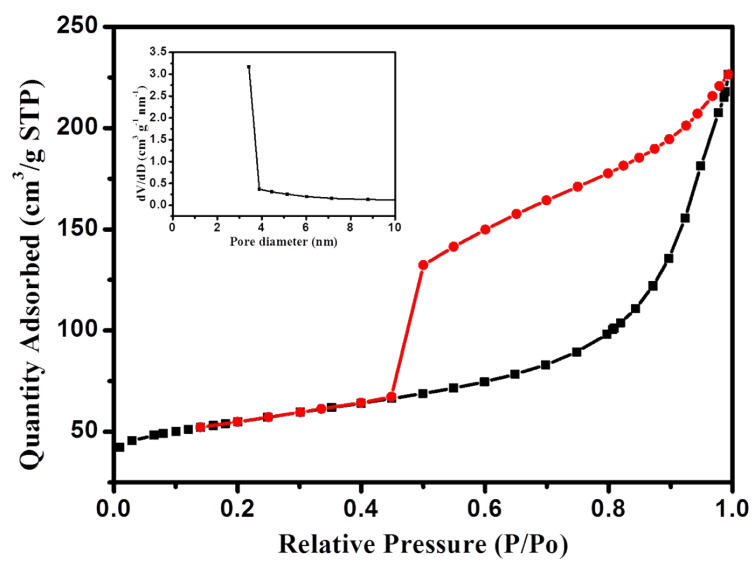

**Fig. S4** Nitrogen isothermal adsorption-desorption curves for Fe@C-800. Inset: pore size distribution profile based on the DFT model.

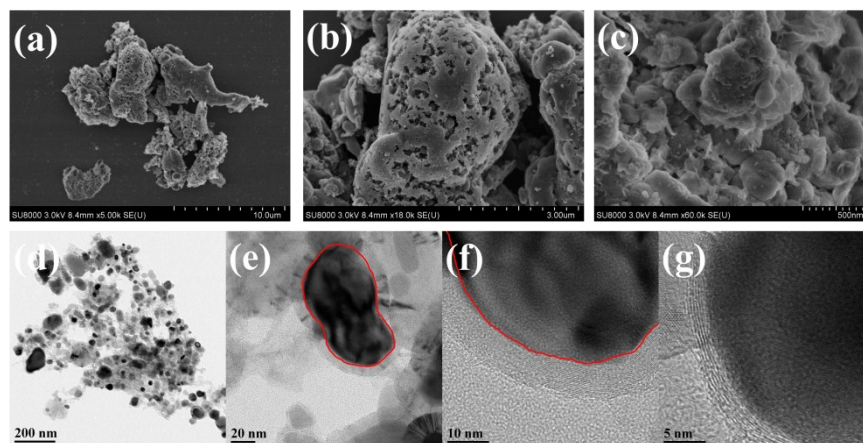

Fig. S5 (a-c) SEM and (d-g) TEM/HRTEM images of Fe@NC-800.

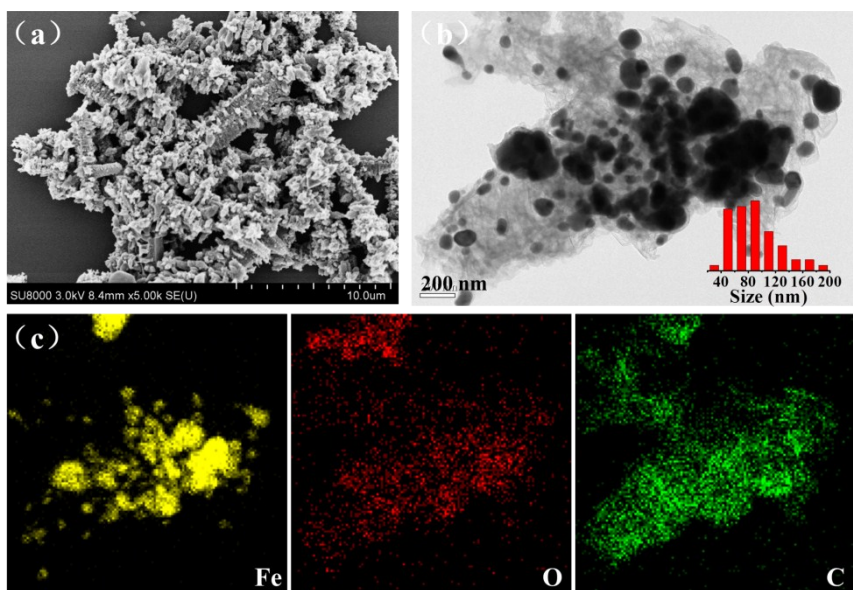

**Fig. S6** (a) SEM and (b) TEM images of Fe@C-800. (c) Elemental mapping revealing the elemental distribution.

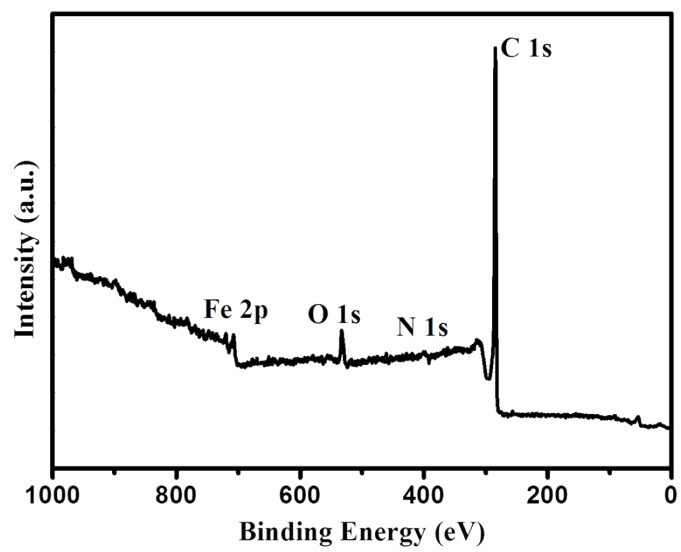

**Fig. S7** XPS survey spectra of Fe@NC-800.



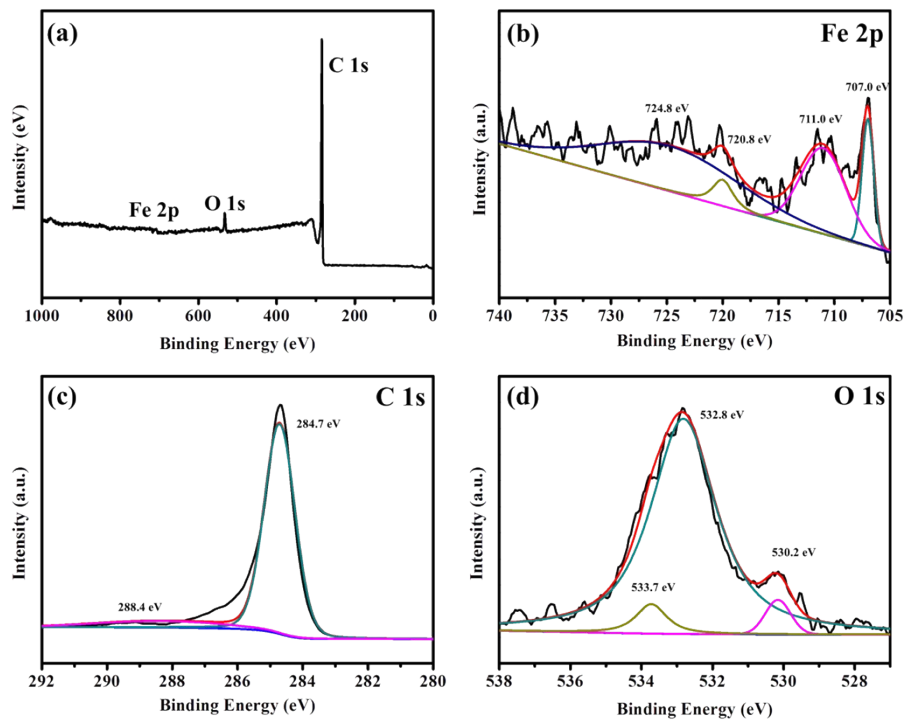

**Fig. S8** XPS survey spectra of (a) Fe@C-800, (b) Fe 2p, (c) C 1s and (d) O 1s of Fe@C-800.

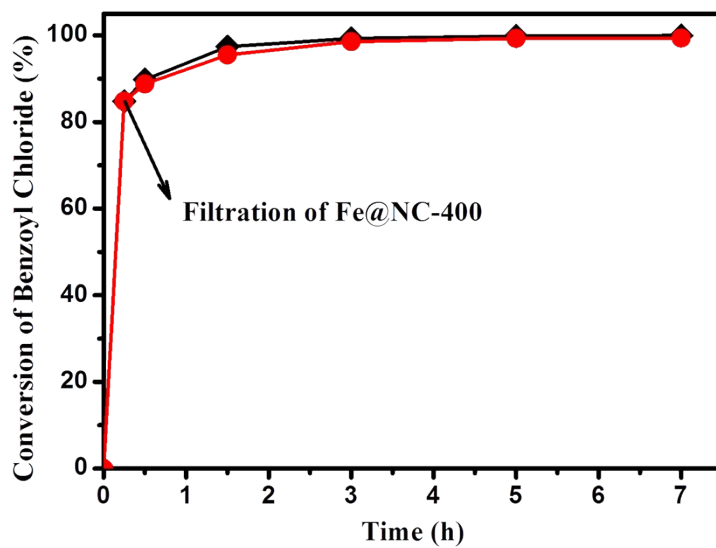

**Fig. S9** Friedel-Crafts acylation property over (◆) Fe@NC-400 and the leaching test (●). Reaction conditions: 130 °C reaction temperature; 20 mmol m-xylene, 10 mmol benzoyl chloride, and 10 mmol dodecane; 50 mg catalyst.

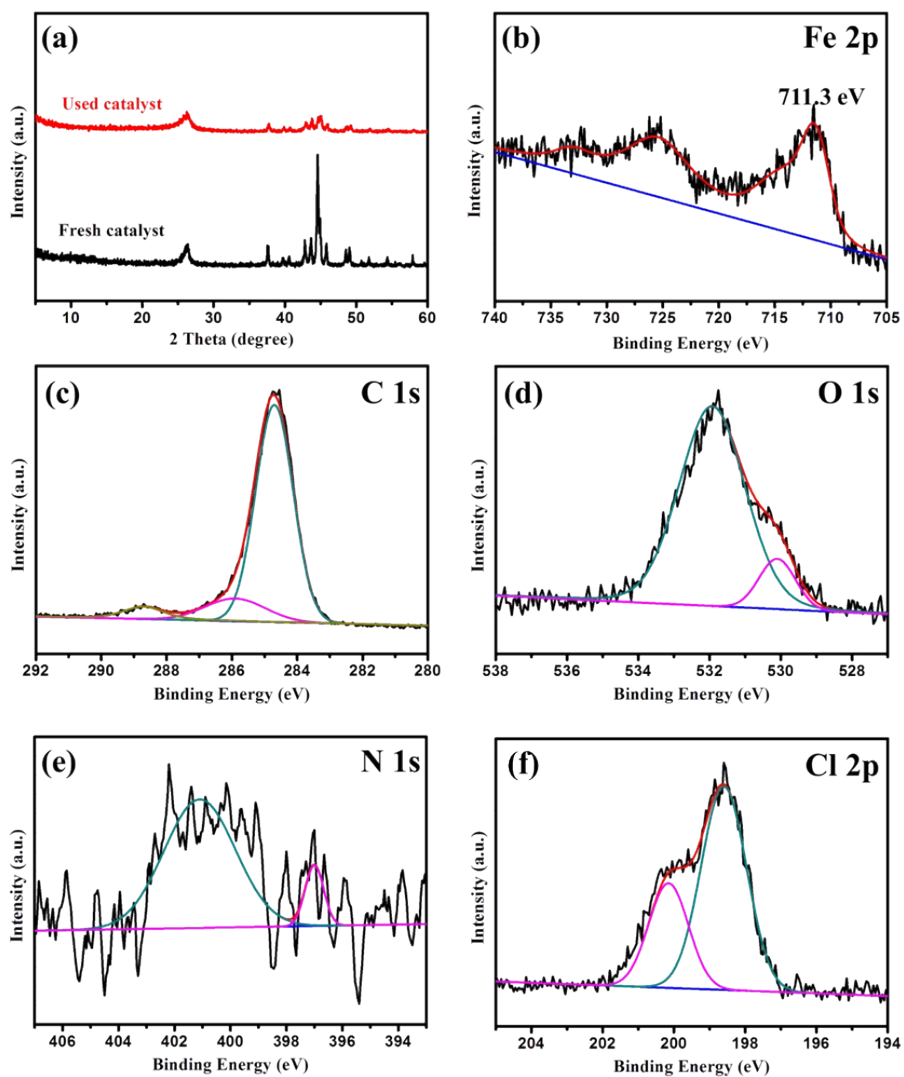

**Fig. S10** (a) XRD diffraction patterns of fresh and used Fe@NC-800 catalysts after five consecutive cycles; and XPS survey spectra of (b) Fe 2p, (c) C 1s, (d) O 1s, (e) N 1s and (f) Cl 2p of the used Fe@NC-800 catalyst.

**Table S1** Summary of the porous properties of Fe@NC-*T* and Fe@C-800 catalysts.

|            | $S_{\text{BET}}^a$ (m <sup>2</sup> g <sup>-1</sup> ) | $S_{\text{micro}}^b$ (m <sup>2</sup> g <sup>-1</sup> ) | $S_{\text{meso}}^c$ (m <sup>2</sup> g <sup>-1</sup> ) | $V_{\text{pore}}^d$ (cm <sup>3</sup> g <sup>-1</sup> ) |
|------------|------------------------------------------------------|--------------------------------------------------------|-------------------------------------------------------|--------------------------------------------------------|
| Fe@NC-600  | 232                                                  | 147                                                    | 85                                                    | 0.24                                                   |
| Fe@NC-800  | 174                                                  | 51                                                     | 123                                                   | 0.35                                                   |
| Fe@NC-1000 | 119                                                  | 39                                                     | 80                                                    | 0.26                                                   |
| Fe@C-800   | 180                                                  | 75                                                     | 105                                                   | 0.32                                                   |

<sup>a</sup> Calculated via the BET method.

<sup>b</sup> Calculated via the t-plot method.

<sup>c</sup>  $S_{\text{meso}} = S_{\text{BET}} - S_{\text{micro}}$ .

<sup>d</sup> Calculated based on the N<sub>2</sub> adsorption at  $p/p_0 = 0.99$ .

**Table S2** The element compositions of various samples determined from a PerkinElmer 2400 CHN elemental analyzer and ICP-AES.

| Samples      | Element analysis |          |          |          |           |
|--------------|------------------|----------|----------|----------|-----------|
|              | C (wt %)         | H (wt %) | N (wt %) | O (wt %) | Fe (wt %) |
| Fe-TPA       | 39.14            | 3.24     | -        | 40.76    | 16.86     |
| Fe-DABCO-TPA | 53.59            | 5.25     | 7.00     | 27.33    | 6.83      |
| Fe@C-800     | 27.57            | 0.30     | -        | 12.51    | 59.62     |
| Fe@NC-800    | 50.92            | 0.43     | 0.51     | 2.74     | 45.40     |
| Fe@NC-800*   |                  |          |          |          | 44.74     |

\* The used Fe@NC-800 catalyst after FCA reactions.

**Table S3** The elemental contents on the surface of Fe@NC-800 obtained from XPS.

| Samples    | Elemental composition (At. %) |       |       |      |       |
|------------|-------------------------------|-------|-------|------|-------|
|            | C 1s                          | O 1s  | Fe 2p | N 1s | Cl 2p |
| Fe@C-800   | 94.75                         | 4.81  | 0.44  | -    | -     |
| Fe@NC-800  | 84.56                         | 10.40 | 1.08  | 3.97 | -     |
| Fe@NC-800* | 85.06                         | 5.55  | 1.27  | 2.68 | 5.44  |

\* The used Fe@NC-800 catalyst after FCA reactions.
